# Supplementary material for: Functional diversification of two UGT80 enzymes required for steryl glucoside synthesis in Arabidopsis
Source: PubMed Central journal article supplement (PMC4265157; doi:10.1093/jxb/eru410), 2014-10-14
Supplement: supp_eru410_jexbot130930_file001.pdf [file supp_eru410_jexbot130930_file001.pdf]

# Functional diversification of two UGT80 enzymes required for steryl glucoside synthesis in *Arabidopsis* seeds

Daniel F. Stucky, James C. Arpin, and Kathrin Schrick

## Supplementary Data

**Fig. S1.** Molecular characterization of T-DNA insertion mutants for *UGT80A2*, *UGT80B1* and *UGT713B1/At5g24750* in the Col-0 accession.

**Fig. S2.** Plant growth comparison.

**Fig. S3.** Expression of *UGT80A2* and *UGT713B1/At5g24750* enzymes in *E. coli*.

**Table S1.** Oligonucleotides used in this study.

**Table S2.** Mass spectral scan values for SGs and ASGs.

**Table S3.** Mass spectral scan values for steryl glucuronides and rhamnosides.

**Table S4.** List of protein sequences for phylogenetic tree from Fig. 1.

**Table S5.** SG, ASG, steryl glucuronides, and steryl rhamnosides quantification in *ugt80* and *ugt713* mutant seeds.

**Table S6.** *In vitro* steryl glucosyltransferase activity of *UGT80A2*, *UGT80B1*, and *UGT713B1* enzymes.

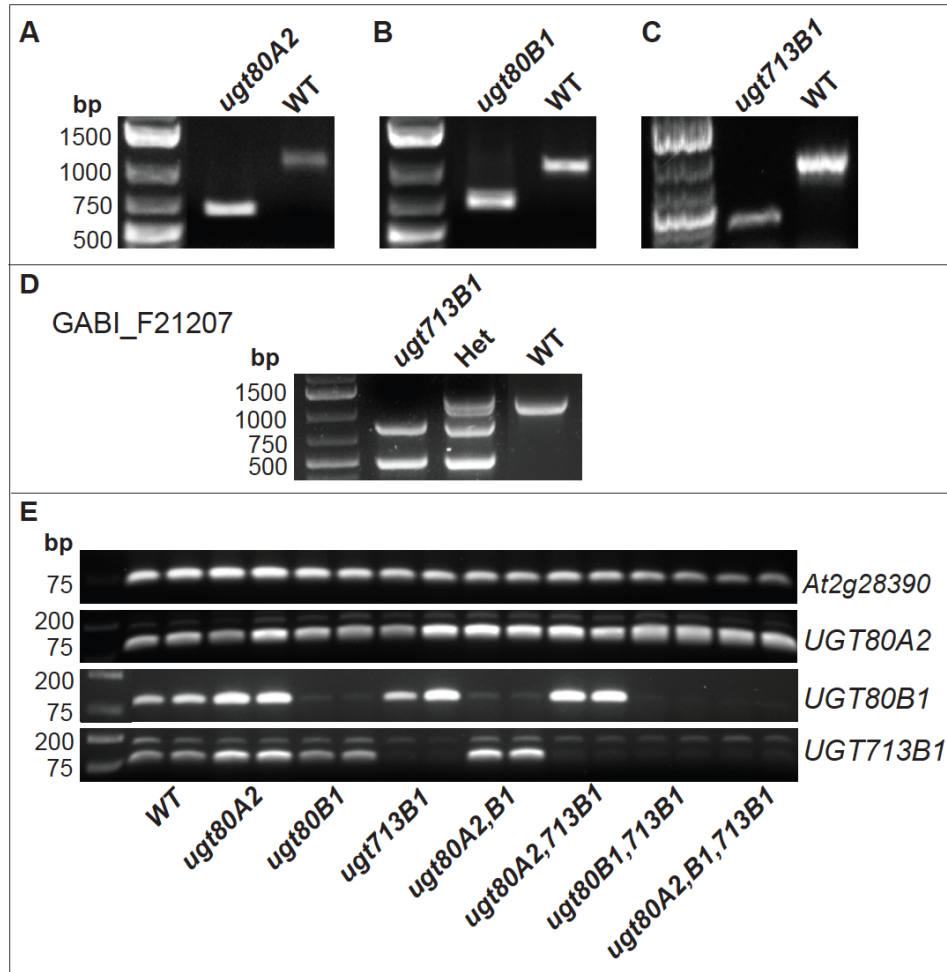

**Figure S1. Molecular characterization of T-DNA insertion mutants for *UGT80A2*, *UGT80B1* and *UGT713B1/At5g24750* in the Col-0 accession.**

(A-C) PCR genotyping is shown for the SALK T-DNA insertion lines. In mutant alleles a ~0.5-0.8 kb fragment is amplified versus a larger ~1.0 kb fragment in wild-type (WT).

(D) PCR genotyping for the GABI-Kat T-DNA insertion line corresponding to *UGT713B1*. For the mutant allele, two fragments are amplified while a larger ~1.0 kb fragment is observed in WT. Heterozygous plants express the combination of fragments.

(E) RNA was isolated from the *ugt80A2*, *ugt80B1* and *ugt713B1* single, double and the triple mutant seedlings, and semi-quantitative RT-PCR was performed with gene-specific primers for the three *UGT* genes. The SALK T-DNA insertion lines shown in (A) were used for the analysis. Two independent biological replicates are shown for each genotype. Transcript expression of Sand family member *At2g28390* served as the reference gene. Both *ugt80B1* and *ugt713B1* mutant alleles represent mRNA knock-downs.

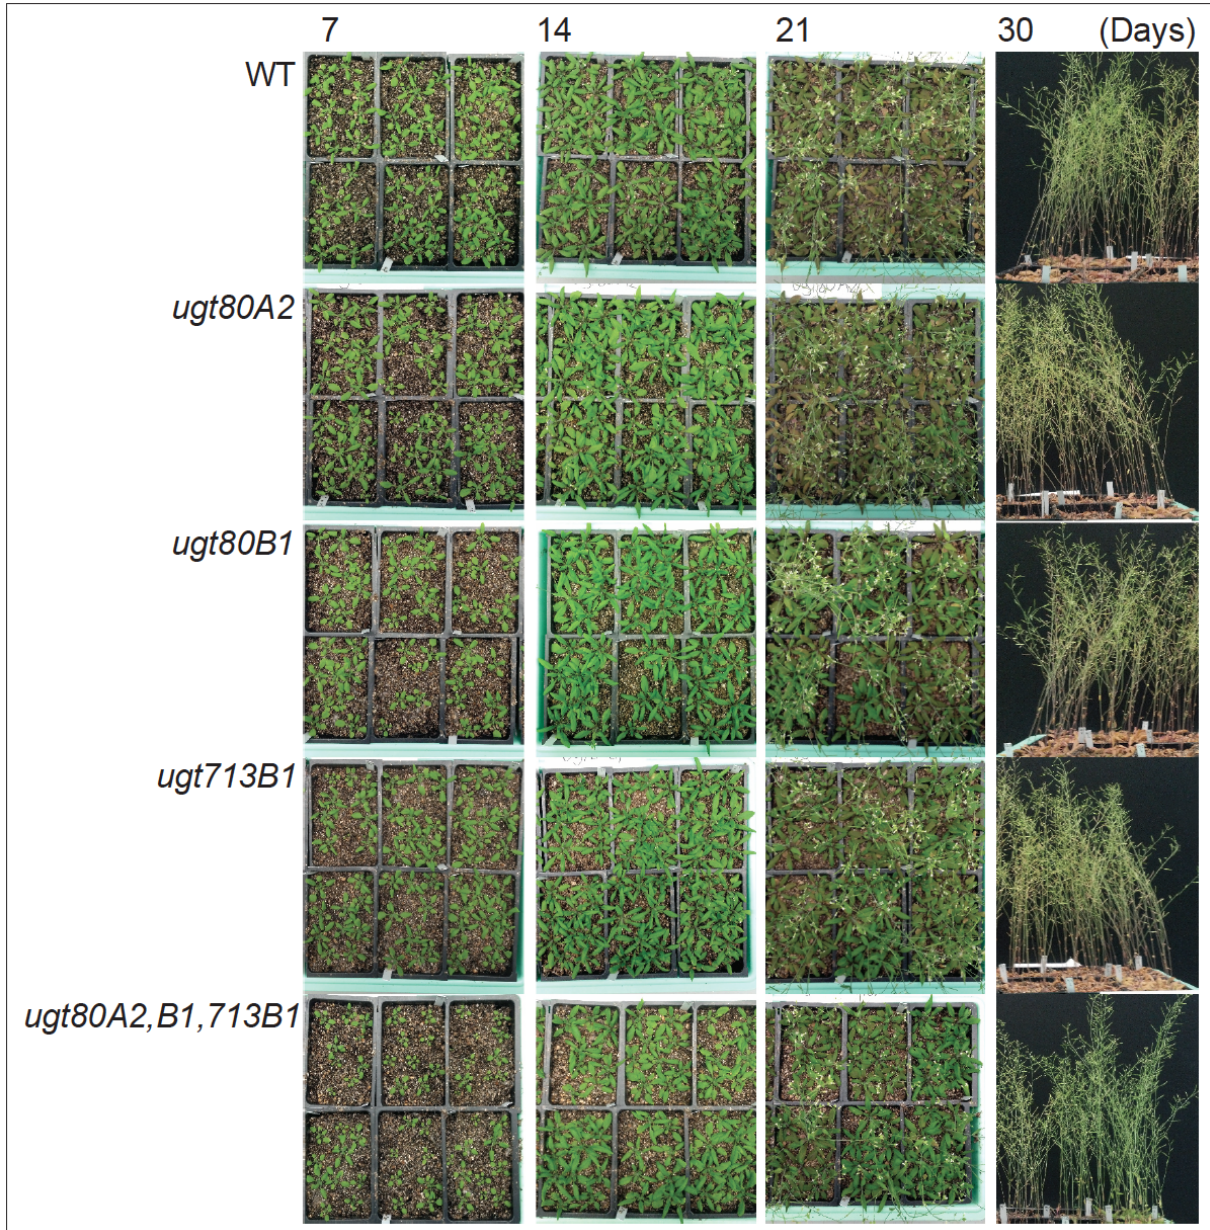

**Figure S2. Plant growth comparison.** *Arabidopsis* Col wild-type (WT), *ugt80A2*, *ugt80B1*, and *ugt713B1* mutants and the triple mutant were grown under continuous light for 30 days and monitored for differences in growth and senescence. Water (500 ml per tray of 12 pots) was given every two days. No obvious defects among the mutants were observed in comparison to WT.

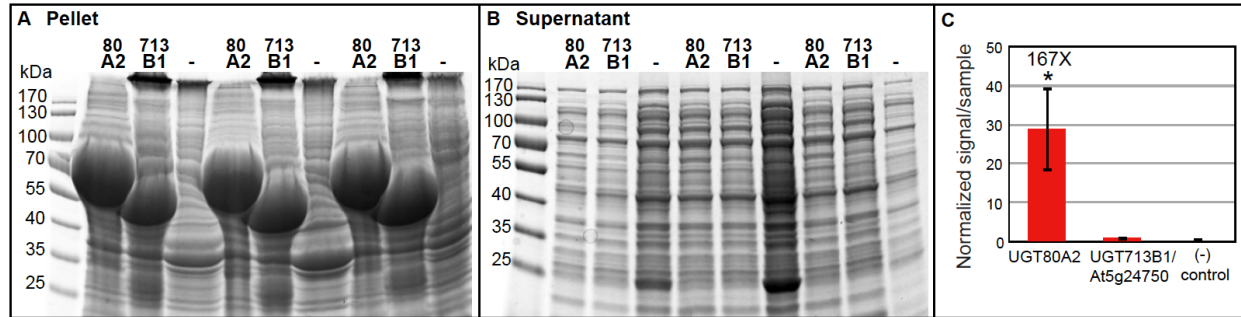

**Figure S3. Expression of UGT80A2 and UGT713B1/At5g24750 enzymes in *E. coli*.**

Microsomal fractions were prepared from *E. coli* cultures and used for *in vitro* enzyme activity assays.

**(A-B)** Protein expression was analyzed by SDS-PAGE. Three biological replicates for UGT80A2 (80A2), UGT713B1 (713B1) and the negative control (-) are shown. The negative control consisted of a truncated GCS/At2g19880 gene.

**(A)** Pellet fractions indicate the presence of ~69 and ~59 kDa proteins for samples containing UGT80A2 and UGT713B1, respectively.

**(B)** Supernatants lack the expressed proteins.

**(C)** Pellet fractions expressing UGT enzymes or the negative control (-) were incubated with cholesterol and UDP-glucose. Lipid extractions were analyzed by ESI-MS/MS and normalized signals per sample are shown. Enzyme activity for production of cholesteryl glucoside was observed for UGT80A2 whereas little or no activity was detected for UGT713B1. Fold change over the control is indicated for UGT80A2. Error bars denote standard deviations (n=3). A significant increase in cholesteryl glucoside production in comparison to the control is marked by an asterisk (Two-tiered *t*-test,  $P \leq 0.05$ ).

**Table S1. Oligonucleotides used in this study.**

| <b>A. Primers genotyping <i>ugt80</i> and <i>ugt713</i> mutant alleles.</b>                                                               |                                                     |
|-------------------------------------------------------------------------------------------------------------------------------------------|-----------------------------------------------------|
| <b>Name</b>                                                                                                                               | <b>5'-3' sequence</b>                               |
| ugt80A2_SALK_020939_R                                                                                                                     | CTT AGC AGC ATC CTC AGC AAG                         |
| ugt80A2_SALK_020939_L                                                                                                                     | TGG AGA CCT TTT GCG TGT AAG                         |
| ugt80B1_SALK_103581_R                                                                                                                     | ATT GTG TGG GTT TAG GCA GTG                         |
| ugt80B1_SALK_103581_L                                                                                                                     | TGG GTA GAG CCA TTT CAT TTG                         |
| ugt713B1_SALK_080068_R                                                                                                                    | TGG TTT GTT GTG AAG TGA TCG                         |
| ugt713B1_SALK_080068_L                                                                                                                    | TTC CGA AAA TGG TTC TGA ATG                         |
| ugt713B1_GABI_212F07_LP_1150                                                                                                              | TTC CGA AAA TGG TTC TGA ATG                         |
| ugt713B1_GABI_212F07_RP_1150                                                                                                              | AAG GAA AAT GTT TGC GTT GTG                         |
| LBb1 (for <i>ugt80A2</i> and <i>ugt80B1</i> )                                                                                             | GCG TGG ACC GCT TGC TGC AAC T                       |
| LBb1.3 (for <i>ugt713B1</i> )                                                                                                             | ATT TTG CCG ATT TCG GAA C                           |
| o8409 GABI-KAT LB                                                                                                                         | ATA TTG ACC ATC ATA CTC ATT GC                      |
| <b>B. Primers for real-time PCR and semi-quantitative RT-PCR.</b> Amplicon sizes are indicated in parentheses adjacent to forward primer. |                                                     |
| UGT80A2_37_F (80 bp)                                                                                                                      | CGCATACGCAAATTCGAGATACACG                           |
| UGT80A2_116_R                                                                                                                             | GCATCGTGATTCTCTCTCTATCTCCACC                        |
| UGT80A2_2712_F (103 bp)                                                                                                                   | TGGAGTCCTCACCTTGTACCAAAGC                           |
| UGT80A2_2896_R                                                                                                                            | CTGCAGGAGGTTTCATAGTTGGATGC                          |
| UGT80B1_563_F (104 bp)                                                                                                                    | CTGATGGGCATAGGGGACTAGACCA                           |
| UGT80B1_666_R                                                                                                                             | TGTCAAGGACCGAGAGTACTGAATCTCA                        |
| UGT713B1_245_F (87 bp)                                                                                                                    | TTCCTATCAATTCTCCTCCTGCTCTGTC                        |
| UGT713B1_331_R                                                                                                                            | CCTCCAAAAACATTTTCCTCAGCG                            |
| At2g28390_F (61 bp)                                                                                                                       | AACTCTATGCAGCATTTGATCCACT (Czechowski et al., 2005) |
| At2g28390_R                                                                                                                               | TGATTGCATATCTTTATCGCCATC (Czechowski et al., 2005)  |
| ARP6_real-time_F (130 bp)                                                                                                                 | TAACAACCTCAGGAGGCCCA (Dekkers et al., 2012)         |
| ARP6_real-time_R                                                                                                                          | CTACGACACCGAGCTGAT (Dekkers et al., 2012)           |

**Czechowski T, Stitt M, Altmann T, Udvardi MK, Scheible WR (2005)** Genome-wide identification and testing of superior reference genes for transcript normalization in *Arabidopsis*. *Plant Physiol.* **139**: 5-17

**Dekkers, BJW, Willems, L, Bassel, GW, van Bolderen-Veldkamp, RPM, Ligterink, W, Hilhorst, HWM, Bentsink, L. (2012).** Identification of reference genes for RT-qPCR expression analysis in *Arabidopsis* and tomato seeds. *Plant & Cell Physiol.* **53**: 28-37

**Table S2. Mass spectral scan values for SGs and ASGs.**

| Class                              | Formula [M]                                     | Scan mode | Mass of intact ion analyzed<br>[M+NH <sub>4</sub> ] <sup>+</sup> (m/z) |
|------------------------------------|-------------------------------------------------|-----------|------------------------------------------------------------------------|
| <b>Steryl Glucoside (SG)</b>       |                                                 |           |                                                                        |
| cholesteryl                        | C <sub>33</sub> H <sub>56</sub> O <sub>6</sub>  | +NL 197   | 566.4                                                                  |
| ergosteryl                         | C <sub>34</sub> H <sub>54</sub> O <sub>6</sub>  | +NL 197   | 576.4                                                                  |
| brassicasteryl                     | C <sub>34</sub> H <sub>56</sub> O <sub>6</sub>  | +NL 197   | 578.4                                                                  |
| campesteryl                        | C <sub>34</sub> H <sub>58</sub> O <sub>6</sub>  | +NL 197   | 580.4                                                                  |
| stigmasteryl                       | C <sub>35</sub> H <sub>58</sub> O <sub>6</sub>  | +NL 197   | 592.4                                                                  |
| sitosteryl                         | C <sub>35</sub> H <sub>60</sub> O <sub>6</sub>  | +NL 197   | 594.4                                                                  |
| <b>Acyl Steryl Glucoside (ASG)</b> |                                                 |           |                                                                        |
| 16:0 cholesteryl                   | C <sub>49</sub> H <sub>90</sub> O <sub>7</sub>  | +NL 435   | 804.7                                                                  |
| 16:0 brassicasteryl                | C <sub>50</sub> H <sub>90</sub> O <sub>7</sub>  | +NL 435   | 816.7                                                                  |
| 16:0 campesteryl                   | C <sub>50</sub> H <sub>92</sub> O <sub>7</sub>  | +NL 435   | 818.7                                                                  |
| 16:0 stigmasteryl                  | C <sub>51</sub> H <sub>92</sub> O <sub>7</sub>  | +NL 435   | 830.7                                                                  |
| 16:0 sitosteryl                    | C <sub>51</sub> H <sub>94</sub> O <sub>7</sub>  | +NL 435   | 832.7                                                                  |
| 18:3 cholesteryl                   | C <sub>51</sub> H <sub>88</sub> O <sub>7</sub>  | +NL 457   | 826.7                                                                  |
| 18:3 brassicasteryl                | C <sub>52</sub> H <sub>88</sub> O <sub>7</sub>  | +NL 457   | 838.7                                                                  |
| 18:3 campesteryl                   | C <sub>52</sub> H <sub>90</sub> O <sub>7</sub>  | +NL 457   | 840.7                                                                  |
| 18:3 stigmasteryl                  | C <sub>53</sub> H <sub>90</sub> O <sub>7</sub>  | +NL 457   | 852.7                                                                  |
| 18:3 sitosteryl                    | C <sub>53</sub> H <sub>92</sub> O <sub>7</sub>  | +NL 457   | 854.7                                                                  |
| 18:2 cholesteryl                   | C <sub>51</sub> H <sub>90</sub> O <sub>7</sub>  | +NL 459   | 828.7                                                                  |
| 18:2 brassicasteryl                | C <sub>52</sub> H <sub>90</sub> O <sub>7</sub>  | +NL 459   | 840.7                                                                  |
| 18:2 campesteryl                   | C <sub>52</sub> H <sub>92</sub> O <sub>7</sub>  | +NL 459   | 842.7                                                                  |
| 18:2 stigmasteryl                  | C <sub>53</sub> H <sub>92</sub> O <sub>7</sub>  | +NL 459   | 854.7                                                                  |
| 18:2 sitosteryl                    | C <sub>53</sub> H <sub>94</sub> O <sub>7</sub>  | +NL 459   | 856.7                                                                  |
| 18:1 cholesteryl                   | C <sub>51</sub> H <sub>92</sub> O <sub>7</sub>  | +NL 461   | 830.7                                                                  |
| 18:1 brassicasteryl                | C <sub>52</sub> H <sub>92</sub> O <sub>7</sub>  | +NL 461   | 842.7                                                                  |
| 18:1 campesteryl                   | C <sub>52</sub> H <sub>94</sub> O <sub>7</sub>  | +NL 461   | 844.7                                                                  |
| 18:1 stigmasteryl                  | C <sub>53</sub> H <sub>94</sub> O <sub>7</sub>  | +NL 461   | 856.7                                                                  |
| 18:1 sitosteryl                    | C <sub>53</sub> H <sub>96</sub> O <sub>7</sub>  | +NL 461   | 858.7                                                                  |
| 18:0 cholesteryl                   | C <sub>51</sub> H <sub>94</sub> O <sub>7</sub>  | +NL 463   | 832.7                                                                  |
| 18:0 brassicasteryl                | C <sub>52</sub> H <sub>94</sub> O <sub>7</sub>  | +NL 463   | 844.7                                                                  |
| 18:0 campesteryl                   | C <sub>52</sub> H <sub>96</sub> O <sub>7</sub>  | +NL 463   | 846.7                                                                  |
| 18:0 stigmasteryl                  | C <sub>53</sub> H <sub>96</sub> O <sub>7</sub>  | +NL 463   | 858.7                                                                  |
| 18:0 sitosteryl                    | C <sub>53</sub> H <sub>98</sub> O <sub>7</sub>  | +NL 463   | 860.7                                                                  |
| 20:1 cholesteryl                   | C <sub>53</sub> H <sub>98</sub> O <sub>7</sub>  | +NL 489   | 860.7                                                                  |
| 20:1 brassicasteryl                | C <sub>54</sub> H <sub>98</sub> O <sub>7</sub>  | +NL 489   | 872.7                                                                  |
| 20:1 campesteryl                   | C <sub>54</sub> H <sub>100</sub> O <sub>7</sub> | +NL 489   | 874.7                                                                  |
| 20:1 stigmasteryl                  | C <sub>55</sub> H <sub>100</sub> O <sub>7</sub> | +NL 489   | 886.7                                                                  |
| 20:1 sitosteryl                    | C <sub>55</sub> H <sub>102</sub> O <sub>7</sub> | +NL 489   | 888.8                                                                  |

**Table S3. Mass spectral scan values for steryl glucuronides and rhamnosides.**

| Class                     | Formula [M]                                    | Scan mode | Mass of intact ion analyzed<br>[M+NH <sub>4</sub> ] <sup>+</sup> (m/z) |
|---------------------------|------------------------------------------------|-----------|------------------------------------------------------------------------|
| <b>Steryl Glucuronide</b> |                                                |           |                                                                        |
| cholesteryl               | C <sub>33</sub> H <sub>54</sub> O <sub>7</sub> | +NL 211   | 580.4                                                                  |
| ergosteryl                | C <sub>34</sub> H <sub>52</sub> O <sub>7</sub> | +NL 211   | 590.4                                                                  |
| brassicasteryl            | C <sub>34</sub> H <sub>54</sub> O <sub>7</sub> | +NL 211   | 592.4                                                                  |
| campesteryl               | C <sub>34</sub> H <sub>56</sub> O <sub>7</sub> | +NL 211   | 594.4                                                                  |
| stigmasteryl              | C <sub>35</sub> H <sub>56</sub> O <sub>7</sub> | +NL 211   | 606.4                                                                  |
| sitosteryl                | C <sub>35</sub> H <sub>58</sub> O <sub>7</sub> | +NL 211   | 608.4                                                                  |
| <b>Steryl Rhamnoside</b>  |                                                |           |                                                                        |
| cholesteryl               | C <sub>33</sub> H <sub>56</sub> O <sub>5</sub> | +NL 181   | 550.4                                                                  |
| ergosteryl                | C <sub>34</sub> H <sub>54</sub> O <sub>5</sub> | +NL 181   | 560.4                                                                  |
| brassicasteryl            | C <sub>34</sub> H <sub>56</sub> O <sub>5</sub> | +NL 181   | 562.4                                                                  |
| campesteryl               | C <sub>34</sub> H <sub>58</sub> O <sub>5</sub> | +NL 181   | 564.4                                                                  |
| stigmasteryl              | C <sub>35</sub> H <sub>58</sub> O <sub>5</sub> | +NL 181   | 576.4                                                                  |
| sitosteryl                | C <sub>35</sub> H <sub>60</sub> O <sub>5</sub> | +NL 181   | 578.4                                                                  |

**Table S4. List of protein sequences for phylogenetic tree from Fig. 1.**

Amino acid sequences are shown in the same order as in Fig. 1, from top to bottom. GenBank accession numbers and amino acid lengths are listed. Asterisks indicate sequences that were not assigned UGT names due to incomplete sequence or lack of EST support.

| <b>Name in Phylogenetic Tree</b>           | <b>Official Names</b> | <b>GenBank Accession</b> | <b>Amino Acids</b> |
|--------------------------------------------|-----------------------|--------------------------|--------------------|
| <i>Arabidopsis thaliana</i> UGT80A2        | UGT80A2/At3g07020     | NP_566297.2              | 637                |
| <i>Arabidopsis lyrata</i> UGT80A12         | UGT80A12              | XP_002884620.1           | 635                |
| <i>Capsella rubella</i> UGT80A13           | UGT80A13              | XP_006297184.1           | 642                |
| <i>Glycine max</i> UGT80A14                | UGT80A14              | XP_003552079.1           | 593                |
| <i>Vitis vinifera</i> UGT80A15             | UGT80A15              | XP_002265023             | 662                |
| <i>Populus trichocarpa</i> UGT80A16        | UGT80A16              | XP_002321244.2           | 619                |
| <i>Solanum lycopersicum</i> UGT80A17       | UGT80A17              | XP_004240462.1           | 641                |
| <i>Brachypodium distachyon</i> UGT80A18    | UGT80A18              | XP_003580955.1           | 614                |
| <i>Zea mays</i> UGT80A19                   | UGT80A19              | NP_001151796.1           | 546                |
| <i>Ricinus communis</i> UGT80A21           | UGT80A21              | XP_002512608.1           | 597                |
| <i>Physcomitrella patens</i> UGT80A8       | UGT80A8               | XP_001780556.1           | 516                |
| <i>Selaginella moellendorffii</i> UGT80A20 | UGT80A20              | XP_002989345.1           | 551                |
| <i>Arabidopsis thaliana</i> UGT80B1        | UGT80B1/At1g43620     | NP_175027.1              | 615                |
| <i>Arabidopsis lyrata</i> UGT80B5          | UGT80B5               | XP_002893951.1           | 625                |
| <i>Capsella rubella</i> UGT80B11           | UGT80B11              | XP_006307008.1           | 620                |
| <i>Glycine max</i> UGT80B6                 | UGT80B6               | XP_003535566             | 625                |
| <i>Vitis vinifera</i> UGT80B7              | UGT80B7               | XP_002265312.1           | 682                |
| <i>Ricinus communis</i> 80B*               |                       | XP_002524293.1           | 644                |
| <i>Populus trichocarpa</i> UGT80B8         | UGT80B8               | XP_002302172.1           | 616                |
| <i>Solanum lycopersicum</i> UGT80B9        | UGT80B9               | XP_004237799.1           | 643                |
| <i>Brachypodium distachyon</i> UGT80B3     | UGT80B3               | XP_003564697.1           | 617                |
| <i>Zea mays</i> UGT80B10                   | UGT80B10              | NP_001132100.1           | 620                |
| <i>Aspergillus kiwachii</i> *              |                       | GAA88361.1               | 833                |
| <i>Aspergillus niger</i> *                 |                       | XP_001393023.2           | 880                |
| <i>Fusarium graminearum</i> *              |                       | XP_391364.1              | 748                |
| <i>Nectria haematococca</i> *              |                       | XP_003053667.1           | 834                |
| <i>Botryotinia fuckeliana</i> *            |                       | XP_001548189.1           | 1210               |
| <i>Schizophyllum commune</i> *             |                       | XP_003030067             | 517                |
| <i>Serpula lacrymans</i> *                 |                       | EGN96360.1               | 563                |
| <i>Arabidopsis thaliana</i> UGT713B1       | UGT713B1/At5g24750    | NP_568452.2              | 520                |
| <i>Arabidopsis lyrata</i> UGT713B2         | UGT713B2              | XP_002874220.1           | 522                |
| <i>Capsella rubella</i> UGT713B3           | UGT713B3              | XP_006289138.1           | 517                |
| <i>Solanum lycopersicum</i> UGT713C3       | UGT713C3              | XP_004230516.1           | 506                |
| <i>Vitis vinifera</i> UGT713C1             | UGT713C1              | XP_002273501.2           | 599                |
| <i>Ricinus communis</i> UGT713C4           | UGT713C4              | XP_002528612.1           | 512                |
| <i>Populus trichocarpa</i> 713C*           |                       | XP_002303168.2           | 389                |
| <i>Glycine max</i> UGT713C2                | UGT713C2              | XP_003532979.2           | 498                |
| <i>Brachypodium distachyon</i> UGT713A1    | UGT713A1              | XP_003571635.1           | 522                |
| <i>Zea mays</i> UGT713A2                   | UGT713A2              | NP_001183260.1           | 532                |
| <i>Physcomitrella patens</i> UGT718A1      | UGT718A1              | XP_001770940.1           | 507                |
| <i>Selaginella moellendorffii</i> UGT719A1 | UGT719A1              | XP_002964753.1           | 558                |
| <i>Saccharomyces cerevisiae</i> UGT51A1    | UGT51/UGT51A1         | Q06321                   | 1198               |
| <i>Arabidopsis thaliana</i> GCS            | GCS/At2g19880         | NP_001189555.1           | 520                |



**Table S5. SG, ASG, steryl glucuronides, and steryl rhamnosides quantification in *ugt80* and *ugt713* mutant seeds.** Mass spectral signals are shown in nmol per mg dry seed weight. Averages are indicated for n=5, with standard deviations in parentheses. Significant decreases from Col wild-type (WT) are indicated by a single asterisk ( $P \leq 0.05$ ) or double asterisk ( $P \leq 0.0001$ ). See Figs. 4 and 5 for graphical representations of the data.

|                            | WT Col        | <i>ugt80A2</i>  | <i>ugt80B1</i> | <i>ugt713B1</i> | <i>ugt80A2,B1</i> | <i>ugt80A2,713B1</i> | <i>ugt80B1,713B1</i> | <i>ugt80A2,B1,713B1</i> |
|----------------------------|---------------|-----------------|----------------|-----------------|-------------------|----------------------|----------------------|-------------------------|
| <b>Total SGs</b>           | 8.556 (1.020) | 1.862** (0.460) | 7.854 (0.930)  | 10.469 (1.036)  | 0.705** (0.133)   | 2.179** (0.846)      | 7.669 (1.274)        | 0.721** (0.110)         |
| <b>sitosteryl</b>          | 6.289 (0.767) | 1.223** (0.306) | 6.170 (0.874)  | 7.785 (0.752)   | 0.513** (0.099)   | 1.525** (0.649)      | 6.018 (1.022)        | 0.542** (0.090)         |
| <b>campesteryl</b>         | 1.513 (0.174) | 0.503** (0.116) | 1.078* (0.147) | 1.802 (0.235)   | 0.121** (0.020)   | 0.483** (0.122)      | 1.001* (0.143)       | 0.117** (0.016)         |
| <b>stigmasteryl</b>        | 0.597 (0.068) | 0.086** (0.029) | 0.563 (0.078)  | 0.705 (0.041)   | 0.052** (0.014)   | 0.130** (0.108)      | 0.556 (0.117)        | 0.046** (0.005)         |
| <b>brassicasteryl</b>      | 0.125 (0.021) | 0.038* (0.009)  | 0.081* (0.010) | 0.138 (0.010)   | 0.010* (0.002)    | 0.031* (0.006)       | 0.075* (0.009)       | 0.010* (0.002)          |
| <b>cholesteryl</b>         | 0.032 (0.006) | 0.012* (0.003)  | 0.018* (0.004) | 0.038 (0.004)   | 0.008* (0.003)    | 0.010* (0.001)       | 0.019* (0.002)       | 0.006* (0.002)          |
|                            |               |                 |                |                 |                   |                      |                      |                         |
| <b>Total ASGs</b>          | 5.503 (0.912) | 5.070 (0.939)   | 5.471 (1.304)  | 7.793 (0.644)   | 1.159* (0.220)    | 5.619 (1.546)        | 5.438 (1.130)        | 1.343* (0.084)          |
| <b>Total 16:0</b>          | 2.618 (0.525) | 2.694 (0.514)   | 3.157 (0.961)  | 4.242 (0.514)   | 0.565* (0.121)    | 3.143 (0.884)        | 3.319 (0.697)        | 0.647* (0.061)          |
| <b>16:0 sitosteryl</b>     | 1.414 (0.322) | 1.421 (0.273)   | 1.877 (0.581)  | 2.326 (0.303)   | 0.335* (0.076)    | 1.702 (0.486)        | 1.981 (0.410)        | 0.400* (0.043)          |
| <b>16:0 campesteryl</b>    | 1.098 (0.207) | 1.177 (0.224)   | 1.179 (0.361)  | 1.781 (0.207)   | 0.198* (0.040)    | 1.333 (0.375)        | 1.240 (0.268)        | 0.209* (0.020)          |
| <b>16:0 stigmasteryl</b>   | 0.053 (0.012) | 0.053 (0.011)   | 0.062 (0.017)  | 0.072 (0.009)   | 0.018* (0.003)    | 0.061 (0.018)        | 0.061 (0.010)        | 0.019* (0.003)          |
| <b>16:0 brassicasteryl</b> | 0.039 (0.015) | 0.033 (0.006)   | 0.028 (0.007)  | 0.051 (0.010)   | 0.007* (0.002)    | 0.036 (0.009)        | 0.025 (0.006)        | 0.007* (0.005)          |
| <b>16:0 cholesteryl</b>    | 0.015 (0.013) | 0.010 (0.003)   | 0.011 (0.004)  | 0.013 (0.005)   | 0.008 (0.005)     | 0.011 (0.001)        | 0.012 (0.005)        | 0.011 (0.003)           |
|                            |               |                 |                |                 |                   |                      |                      |                         |
| <b>Total 18:3</b>          | 0.720 (0.114) | 0.595 (0.125)   | 0.388* (0.129) | 0.914 (0.065)   | 0.088* (0.022)    | 0.615 (0.194)        | 0.302* (0.085)       | 0.091* (0.012)          |
| <b>18:3 sitosteryl</b>     | 0.501 (0.107) | 0.415 (0.085)   | 0.289* (0.087) | 0.666 (0.046)   | 0.057* (0.016)    | 0.433 (0.140)        | 0.224* (0.070)       | 0.054* (0.005)          |
| <b>18:3 campesteryl</b>    | 0.158 (0.043) | 0.130 (0.026)   | 0.054* (0.010) | 0.184 (0.025)   | 0.017* (0.003)    | 0.141 (0.044)        | 0.047* (0.011)       | 0.017* (0.001)          |
| <b>18:3 stigmasteryl</b>   | 0.029 (0.007) | 0.027 (0.007)   | 0.016* (0.002) | 0.031 (0.002)   | 0.008* (0.003)    | 0.025 (0.006)        | 0.015* (0.003)       | 0.007* (0.003)          |
| <b>18:3 brassicasteryl</b> | 0.020 (0.012) | 0.015 (0.006)   | 0.009 (0.004)  | 0.018 (0.007)   | 0.003* (0.002)    | 0.012 (0.003)        | 0.008 (0.003)        | 0.004* (0.003)          |
| <b>18:3 cholesteryl</b>    | 0.011 (0.011) | 0.007 (0.004)   | 0.020 (0.032)  | 0.014 (0.016)   | 0.004 (0.002)     | 0.005 (0.004)        | 0.008 (0.012)        | 0.008 (0.011)           |
|                            |               |                 |                |                 |                   |                      |                      |                         |
| <b>Total 18:2</b>          | 0.504 (0.085) | 0.355* (0.065)  | 0.542 (0.172)  | 0.644 (0.057)   | 0.143* (0.026)    | 0.449 (0.149)        | 0.484 (0.110)        | 0.178* (0.010)          |
| <b>18:2 sitosteryl</b>     | 0.324 (0.055) | 0.230* (0.043)  | 0.365 (0.126)  | 0.416 (0.031)   | 0.088* (0.017)    | 0.297 (0.103)        | 0.331 (0.067)        | 0.109* (0.006)          |
| <b>18:2 campesteryl</b>    | 0.114 (0.017) | 0.084* (0.016)  | 0.103 (0.029)  | 0.164 (0.024)   | 0.029* (0.006)    | 0.109 (0.035)        | 0.097 (0.027)        | 0.032* (0.005)          |
| <b>18:2 stigmasteryl</b>   | 0.029 (0.010) | 0.019 (0.006)   | 0.032 (0.017)  | 0.027 (0.006)   | 0.008* (0.001)    | 0.022 (0.009)        | 0.025 (0.006)        | 0.009* (0.002)          |
| <b>18:2 brassicasteryl</b> | 0.018 (0.016) | 0.009 (0.002)   | 0.011 (0.008)  | 0.016 (0.009)   | 0.004 (0.001)     | 0.008 (0.003)        | 0.008 (0.003)        | 0.005 (0.001)           |
| <b>18:2 cholesteryl</b>    | 0.019 (0.018) | 0.013 (0.002)   | 0.031 (0.029)  | 0.021 (0.018)   | 0.016 (0.004)     | 0.012 (0.004)        | 0.023 (0.017)        | 0.023 (0.006)           |
|                            |               |                 |                |                 |                   |                      |                      |                         |
| <b>Total 18:1</b>          | 1.203 (0.195) | 1.090 (0.192)   | 0.923* (0.174) | 1.486 (0.138)   | 0.201* (0.035)    | 1.059 (0.247)        | 0.912* (0.192)       | 0.237* (0.019)          |
| <b>18:1 sitosteryl</b>     | 0.814 (0.153) | 0.742 (0.131)   | 0.602* (0.131) | 0.997 (0.057)   | 0.122* (0.027)    | 0.728 (0.171)        | 0.623 (0.118)        | 0.136* (0.010)          |
| <b>18:1 campesteryl</b>    | 0.278 (0.045) | 0.269 (0.048)   | 0.224 (0.044)  | 0.369 (0.031)   | 0.038* (0.007)    | 0.262 (0.067)        | 0.214 (0.050)        | 0.047* (0.007)          |
| <b>18:1 stigmasteryl</b>   | 0.035 (0.009) | 0.034 (0.007)   | 0.029 (0.011)  | 0.036 (0.007)   | 0.009* (0.002)    | 0.029 (0.007)        | 0.026 (0.004)        | 0.009* (0.004)          |
| <b>18:1 brassicasteryl</b> | 0.024 (0.012) | 0.021 (0.004)   | 0.017 (0.011)  | 0.034 (0.032)   | 0.005* (0.001)    | 0.016 (0.002)        | 0.012 (0.005)        | 0.006* (0.003)          |
| <b>18:1 cholesteryl</b>    | 0.052 (0.073) | 0.024 (0.007)   | 0.051 (0.045)  | 0.049 (0.068)   | 0.027 (0.009)     | 0.024 (0.007)        | 0.037 (0.033)        | 0.038 (0.009)           |

|                                  | <b>WT Col</b> | <b><i>ugt80A2</i></b> | <b><i>ugt80B1</i></b> | <b><i>ugt713B1</i></b> | <b><i>ugt80A2,B1</i></b> | <b><i>ugt80A2,713B1</i></b> | <b><i>ugt80B1,713B1</i></b> | <b><i>ugt80A2,B1,713B1</i></b> |
|----------------------------------|---------------|-----------------------|-----------------------|------------------------|--------------------------|-----------------------------|-----------------------------|--------------------------------|
| <b>Total 18:0</b>                | 0.267 (0.115) | 0.205 (0.039)         | 0.266 (0.064)         | 0.311 (0.106)          | 0.089* (0.013)           | 0.224 (0.064)               | 0.238 (0.062)               | 0.101* (0.007)                 |
| <b>18:0 sitosteryl</b>           | 0.122 (0.032) | 0.113 (0.019)         | 0.141 (0.043)         | 0.152(0.014)           | 0.036* (0.009)           | 0.123 (0.038)               | 0.116 (0.019)               | 0.040* (0.005)                 |
| <b>18:0 campesteryl</b>          | 0.086 (0.061) | 0.059 (0.010)         | 0.075 (0.024)         | 0.101 (0.043)          | 0.017 (0.003)            | 0.063 (0.018)               | 0.062 (0.014)               | 0.019 (0.003)                  |
| <b>18:0 stigmasteryl</b>         | 0.011 (0.007) | 0.007 (0.001)         | 0.015 (0.007)         | 0.010 (0.005)          | 0.006 (0.003)            | 0.010 (0.004)               | 0.008 (0.003)               | 0.005 (0.002)                  |
| <b>18:0 brassicasteryl</b>       | 0.016 (0.027) | 0.006 (0.002)         | 0.007 (0.007)         | 0.020 (0.035)          | 0.002 (0.001)            | 0.004 (0.000)               | 0.004 (0.002)               | 0.002 (0.002)                  |
| <b>18:0 cholesteryl</b>          | 0.032 (0.020) | 0.020 (0.009)         | 0.027 (0.012)         | 0.027 (0.015)          | 0.029 (0.008)            | 0.024 (0.006)               | 0.048 (0.041)               | 0.035 (0.005)                  |
|                                  |               |                       |                       |                        |                          |                             |                             |                                |
| <b>Total 20:1</b>                | 0.191 (0.087) | 0.131 (0.022)         | 0.196 (0.042)         | 0.197 (0.020)          | 0.072* (0.014)           | 0.131 (0.022)               | 0.184 (0.034)               | 0.101 (0.007)                  |
| <b>20:1 sitosteryl</b>           | 0.000 (0.000) | 0.000 (0.000)         | 0.000 (0.000)         | 0.000 (0.000)          | 0.000 (0.000)            | 0.000 (0.000)               | 0.000 (0.000)               | 0.000 (0.000)                  |
| <b>20:1 campesteryl</b>          | 0.000 (0.000) | 0.000 (0.000)         | 0.000 (0.000)         | 0.000 (0.000)          | 0.000 (0.000)            | 0.000 (0.000)               | 0.000 (0.000)               | 0.000 (0.000)                  |
| <b>20:1 stigmasteryl</b>         | 0.094 (0.015) | 0.075 (0.014)         | 0.128 (0.034)         | 0.113 (0.005)          | 0.034* (0.009)           | 0.077 (0.014)               | 0.124 (0.024)               | 0.045* (0.008)                 |
| <b>20:1 brassicasteryl</b>       | 0.097 (0.084) | 0.057 (0.010)         | 0.068 (0.010)         | 0.084 (0.018)          | 0.038 (0.007)            | 0.053 (0.009)               | 0.060 (0.011)               | 0.045 (0.006)                  |
| <b>20:1 cholesteryl</b>          | 0.000 (0.000) | 0.000 (0.000)         | 0.000 (0.000)         | 0.000 (0.000)          | 0.000 (0.000)            | 0.000 (0.000)               | 0.000 (0.000)               | 0.000 (0.000)                  |
|                                  |               |                       |                       |                        |                          |                             |                             |                                |
| <b>Total Steryl Glucuronides</b> | 0.057 (0.010) | 0.053 (0.026)         | 0.071 (0.028)         | 0.066 (0.028)          | (0.067) (0.017)          | 0.064 (0.022)               | 0.074 (0.010)               | 0.072 (0.022)                  |
| <b>sitosteryl</b>                | 0.035 (0.011) | 0.035 (0.018)         | 0.054 (0.022)         | 0.044 (0.018)          | 0.046 (0.011)            | 0.043 (0.013)               | 0.057 (0.019)               | 0.050 (0.017)                  |
| <b>campesteryl</b>               | 0.010 (0.004) | 0.011 (0.005)         | 0.015 (0.005)         | 0.014 (0.006)          | 0.012 (0.004)            | 0.013 (0.004)               | 0.015 (0.004)               | 0.013 (0.003)                  |
| <b>stigmasteryl</b>              | 0.004 (0.002) | 0.004 (0.002)         | 0.005 (0.002)         | 0.004 (0.002)          | 0.006 (0.002)            | 0.005 (0.002)               | 0.005 (0.001)               | 0.006 (0.002)                  |
| <b>brassicasteryl</b>            | 0.002 (0.001) | 0.003 (0.002)         | 0.003 (0.003)         | 0.004 (0.002)          | 0.003 (0.002)            | 0.003 (0.002)               | 0.004 (0.001)               | 0.004 (0.001)                  |
|                                  |               |                       |                       |                        |                          |                             |                             |                                |
| <b>Total Steryl Rhamnosides</b>  | 0.017 (0.006) | 0.017 (0.011)         | 0.018 (0.005)         | 0.023 (0.014)          | 0.017 (0.008)            | 0.016 (0.008)               | 0.018 (0.006)               | 0.021 (0.010)                  |
| <b>sitosteryl</b>                | 0.008 (0.004) | 0.009 (0.006)         | 0.010 (0.003)         | 0.012 (0.008)          | 0.010 (0.003)            | 0.009 (0.003)               | 0.011 (0.003)               | 0.013 (0.006)                  |
| <b>campesteryl</b>               | 0.004 (0.002) | 0.003 (0.002)         | 0.004 (0.002)         | 0.004 (0.003)          | 0.004 (0.002)            | 0.003 (0.001)               | 0.003 (0.001)               | 0.004 (0.001)                  |
| <b>stigmasteryl</b>              | 0.003 (0.001) | 0.003 (0.002)         | 0.003 (0.002)         | 0.004 (0.002)          | 0.002 (0.001)            | 0.003 (0.002)               | 0.003 (0.002)               | 0.002 (0.001)                  |
| <b>brassicasteryl</b>            | 0.002 (0.001) | 0.002 (0.001)         | 0.002 (0.001)         | 0.002 (0.002)          | 0.001 (0.002)            | 0.002 (0.001)               | 0.003 (0.001)               | 0.002 (0.001)                  |

**Table S6. *In vitro* sterol glucosyltransferase activity of UGT80A2, UGT80B1, and UGT713B1 enzymes.** Enzymes were expressed in yeast (See Materials and Methods). Microsomal extracts were mixed with sterol substrates and either UDP-glucose or UDP-glucuronide. Products of the reactions were analyzed by targeted ESI-MS/MS scans. Averages of normalized signals and standard deviations (parentheses) are shown for n=3 replicates. Significant increases in activity over the control are indicated by asterisk ( $P \leq 0.05$ ). See Fig. 6 for graphical representations of the data for UDP-glucose.

| <b>UDP-Substrate</b>                                              | <b>UDP-Glucose</b> | <b>UDP-Glucuronide</b> |
|-------------------------------------------------------------------|--------------------|------------------------|
| <b>Sterol Substrate</b>                                           |                    |                        |
| <b>Cholesterol</b>                                                |                    |                        |
| Control                                                           | 0.015 (0.001)      | 0.000 (0.000)          |
| UGT80A2                                                           | 5.272* (2.861)     | 0.000 (0.000)          |
| UGT80B1                                                           | 2.282* (0.249)     | 0.029 (0.050)          |
| UGT713B1                                                          | 0.018 (0.011)      | 0.000 (0.000)          |
| <b>Ergosterol</b>                                                 |                    |                        |
| Control                                                           | 0.021 (0.010)      | 0.002 (0.000)          |
| UGT80A2                                                           | 34.5* (11.9)       | 0.003 (0.000)          |
| UGT80B1                                                           | 29.2* (9.6)        | 0.003 (0.000)          |
| UGT713B1                                                          | 0.004 (0.003)      | 0.010 (0.011)          |
| <b>Sterol mixture (brassica- + campe- + sito- + stigmasterol)</b> |                    |                        |
| <b>Brassicasterol</b>                                             |                    |                        |
| Control                                                           | 0.035 (0.010)      | 0.012 (0.011)          |
| UGT80A2                                                           | 2.89* (1.23)       | 0.016 (0.002)          |
| UGT80B1                                                           | 1.14* (0.40)       | 0.009 (0.006)          |
| UGT713B1                                                          | 0.032 (0.000)      | 0.012 (0.006)          |
| <b>Campesterol</b>                                                |                    |                        |
| Control                                                           | 0.012 (0.003)      | 0.001 (0.001)          |
| UGT80A2                                                           | 1.97* (0.82)       | 0.001 (0.001)          |
| UGT80B1                                                           | 0.217* (0.087)     | 0.000 (0.000)          |
| UGT713B1                                                          | 0.015 (0.013)      | 0.004 (0.002)          |
| <b>Sitosterol</b>                                                 |                    |                        |
| Control                                                           | 0.043 (0.030)      | 0.005 (0.001)          |
| UGT80A2                                                           | 4.24* (1.75)       | 0.004 (0.000)          |
| UGT80B1                                                           | 0.290* (0.100)     | 0.004 (0.001)          |
| UGT713B1                                                          | 0.034 (0.023)      | 0.005 (0.001)          |
| <b>Stigmasterol</b>                                               |                    |                        |
| Control                                                           | 0.017 (0.004)      | 0.001 (0.000)          |
| UGT80A2                                                           | 1.58* (0.71)       | 0.001 (0.000)          |
| UGT80B1                                                           | 0.344* (0.142)     | 0.001 (0.000)          |
| UGT713B1                                                          | 0.012 (0.011)      | 0.001 (0.001)          |
